# Supplementary material
Source: publisher figshare collection journal article supplement (https://acs.figshare.com/ndownloader/files/3722872)

# Supporting Information

## Orientation control in thin films of a high- $\chi$ block copolymer with a surface active embedded neutral layer

*Jieqian Zhang<sup>†</sup>, Michael B. Clark<sup>‡</sup>, Chunyi Wu<sup>†</sup>, Mingqi Li<sup>†</sup>, Peter Trefonas III<sup>†</sup>, Phillip D. Hustad<sup>\*†</sup>*

<sup>†</sup> The Dow Chemical Company, 455 Forest Street, Marlborough, MA 01752 USA; <sup>‡</sup> The Dow Chemical Company, 400 Arcola Road, Collegeville, PA 19426 USA

### **Corresponding Author**

\*E-mail: pdhustad@dow.com

**Figure S1.** F1s, N1s, and C1s XPS spectra obtained from the 20% ENL thin film at a thickness of  $1.0 L_0$  and annealing at 250 °C for 5 min after removal of 0, 1.4, 2.9, 5.7 nm of material.

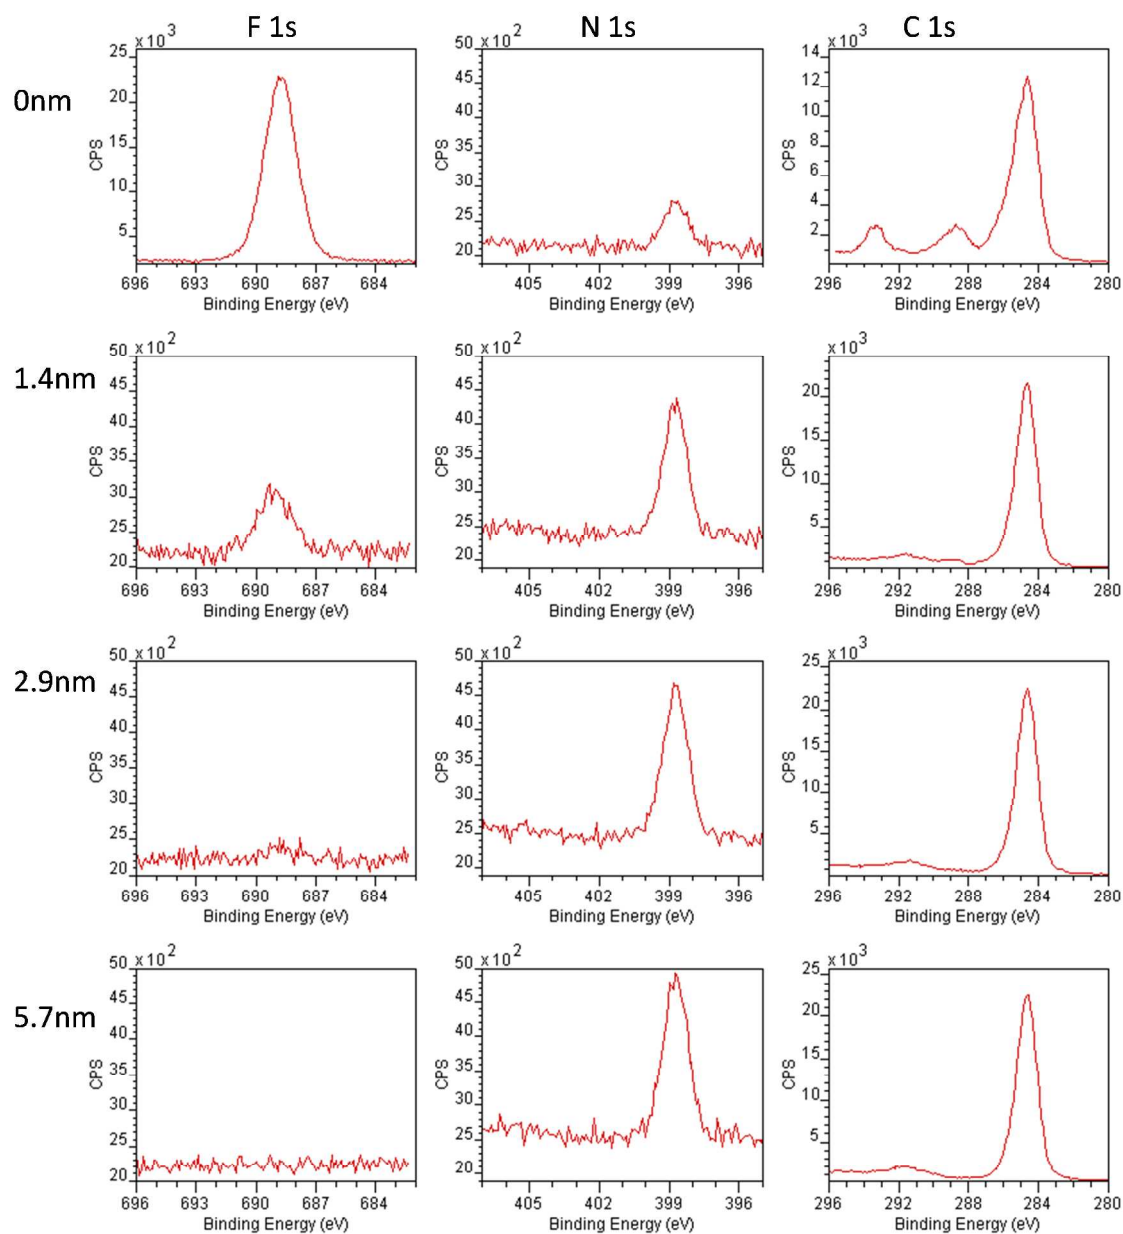

Supplement: Supplementary file 1 [file 3722872]
